# Supplementary material for: Effects of Sucrose Replacement by Polyols on the Dough-Biscuit Transition: Understanding by Model Systems
Source: MDPI journal article supplement (doi:10.3390/foods12030607), 2023-02-01
Supplement: s1 [file s1]

## Supplementary Material

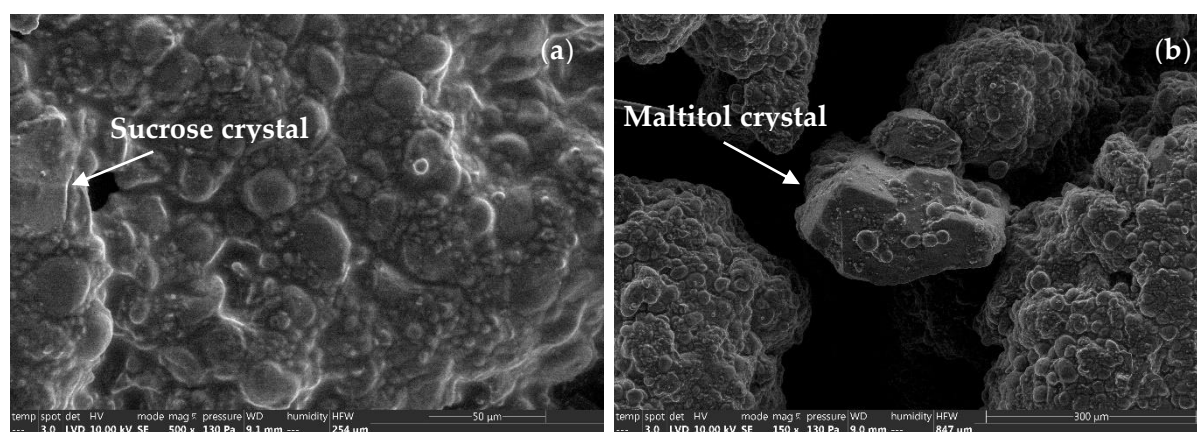

**Figure S1.** Observation of doughs in ESEM. (a): sucrose crystal embedded in dough matrix (white arrow)  $\times 500$ ; (b): maltitol crystal among dough particles (white arrow)  $\times 150$ .
